# Supplementary material
Source: publisher site journal article supplement (https://www.dovepress.com/article/269624)
Supplement: Supplementary file 1 [file get_supplementary_file.php]

**SUPPLEMENTAL MATERIAL**

Table S1. Panel overlap genes

| No. | Gene | No. | Gene | No. | Gene |
| --- | --- | --- | --- | --- | --- |
| 1 | *ALK* | 35 | *DNMT3B* | 69 | *PDGFRA* |
| 2 | *APC* | 36 | *DTX1* | 70 | *PIK3CA* |
| 3 | *ARID1A* | 37 | *DUSP22* | 71 | *PIM1* |
| 4 | *ARID1B* | 38 | *EP300* | 72 | *PRDM1* |
| 5 | *ARID2* | 39 | *EZH2* | 73 | *PTEN* |
| 6 | *ASXL3* | 40 | *FAS* | 74 | *RHOA* |
| 7 | *ATG5* | 41 | *FOXO1* | 75 | *SETD2* |
| 8 | *ATM* | 42 | *FOXO3* | 76 | *SF3B1* |
| 9 | *B2M* | 43 | *FYN* | 77 | *SGK1* |
| 10 | *BCL2* | 44 | *GATA3* | 78 | *SOCS1* |
| 11 | *BCL6* | 45 | *GNA13* | 79 | *SPEN* |
| 12 | *BCOR* | 46 | *ID3* | 80 | *STAT3* |
| 13 | *BCORL1* | 47 | *IDH2* | 81 | *STAT5B* |
| 14 | *BIRC3* | 48 | *IRF4* | 82 | *STAT6* |
| 15 | *BRAF* | 49 | *ITK* | 83 | *STK11* |
| 16 | *BTK* | 50 | *ITPKB* | 84 | *SYK* |
| 17 | *CARD11* | 51 | *JAK1* | 85 | *TCF3* |
| 18 | *CCND1* | 52 | *JAK3* | 86 | *TET2* |
| 19 | *CCND2* | 53 | *KDM6A* | 87 | *TNFAIP3* |
| 20 | *CCND3* | 54 | *KIT* | 88 | *TNFRSF14* |
| 21 | *CD28* | 55 | *KLHL6* | 89 | *TP53* |
| 22 | *CD58* | 56 | *KRAS* | 90 | *TP63* |
| 23 | *CD79A* | 57 | *MAP2K1* | 91 | *TP73* |
| 24 | *CD79B* | 58 | *MAP3K14* | 92 | *TRAF2* |
| 25 | *CDKN2A* | 59 | *MEF2B* | 93 | *TRAF3* |
| 26 | *CDKN2B* | 60 | *MET* | 94 | *TSC1* |
| 27 | *CHD8* | 61 | *MGA* | 95 | *TSC2* |
| 28 | *CIITA* | 62 | *MTOR* | 96 | *XPO1* |
| 29 | *CREBBP* | 63 | *MYC* | 97 | *ZAP70* |
| 30 | *CTLA4* | 64 | *MYD88* | 98 | *KMT2A (MLL)* |
| 31 | *CTNNB1* | 65 | *NF1* | 99 | *KMT2B (MLL4)* |
| 32 | *CXCR4* | 66 | *NOTCH1* | 100 | *KMT2C (MLL3)* |
| 33 | *DDX3X* | 67 | *NOTCH2* | 101 | *KMT2D (MLL2)* |
| 34 | *DNMT3A* | 68 | *NRAS* |  |  |
